# Supplementary material for: Multiple-strategy analyses of ZmWRKY subgroups and functional exploration of ZmWRKY genes in pathogen responses
Source: Royal Society of Chemistry journal article supplement (doi:10.1039/c2mb05483c), 2012-05-08

### **Supplementary tables**

**Table S1** Nomenclature of the WRKY proteins and their orthologs and the information about corresponding genes

### **Supplementary figure legends**

**Figure S1** Intron/exon configurations of WRKY–encoding genes in maize.

Genes of Group II are ordered by the subgroup and the number of *WRKY* genes. Intron phases can be classified based on the position of the intron with respect to the reading frame: phase-0 introns lie between two codons; phase-1 introns interrupt a codon between the first and second bases; and phase-2 introns interrupt a codon between the second- and third-base. The capital letters are the one word abbreviation of amino acids which are interrupted by the introns: V=Val, A=Ala, P=Pro, I=Ile, L=Leu, M=Met, T=Thr, R=Arg, W=Trp, G=Gly, S=Ser, K=Lys, F=Phe.

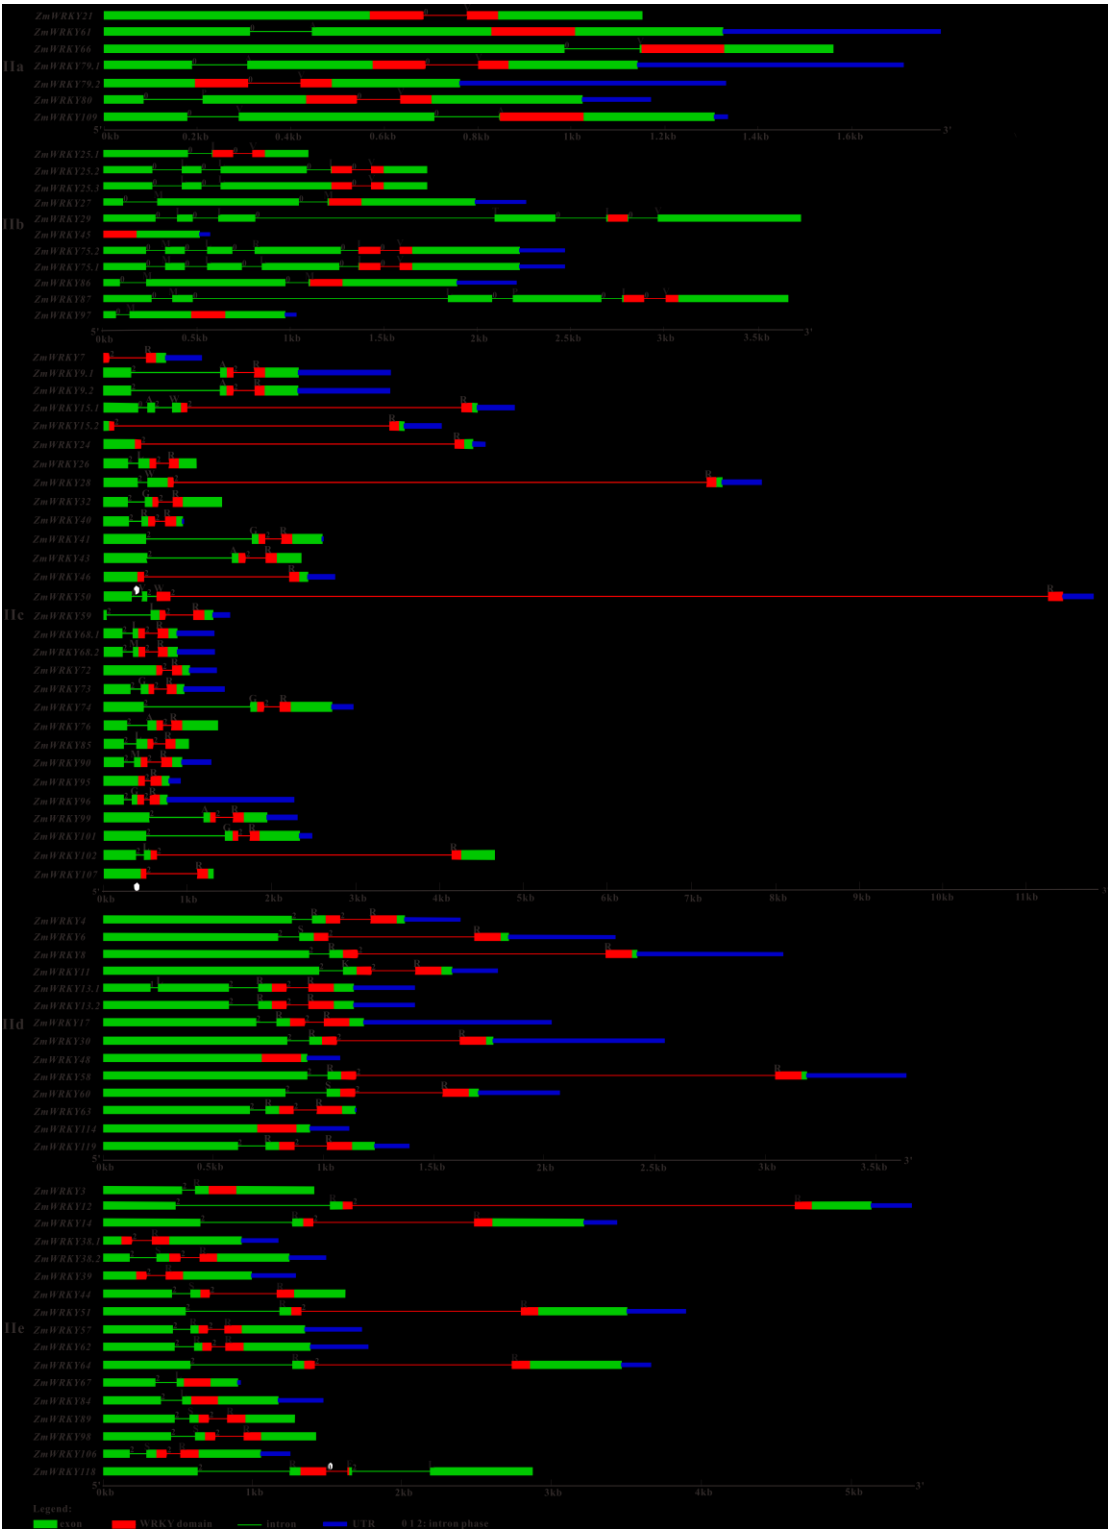

Supplement: c2mb05483c.pdf [file c2mb05483c.pdf]
